# Supplementary material
Source: PubMed Central journal article supplement (PMC3647772)
Supplement: EC.00345-12_zek999094093so1.pdf [file EC.00345-12_zek999094093so1.pdf]

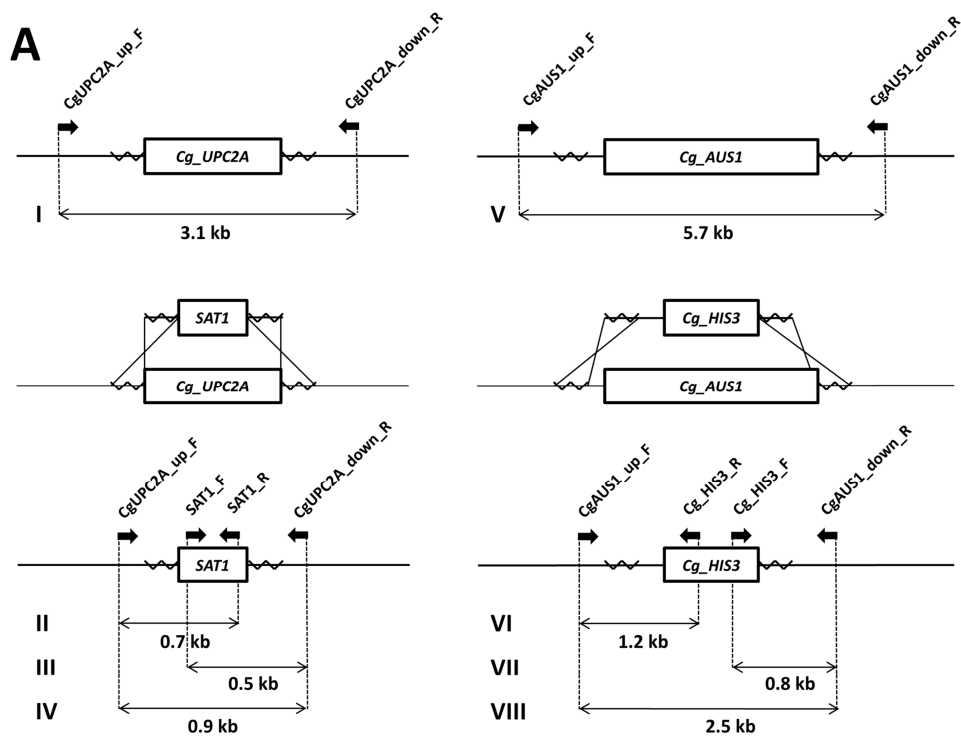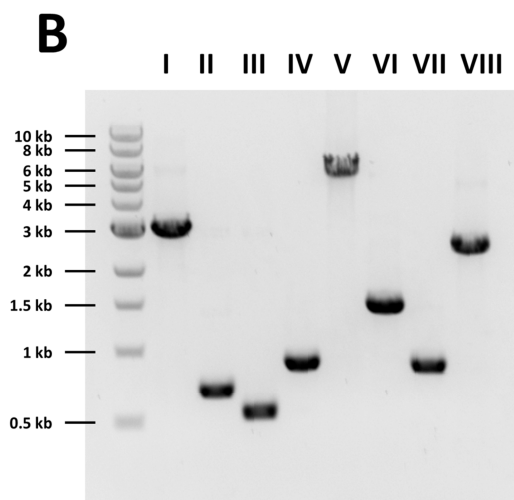

**Figure S1. Scheme of *Cg\_UPC2A* and *Cg\_AUS1* deletion in *C. glabrata* with PCR verification of deletion cassette integration.**

(A) Scheme of gene loci before and after gene deletion with the respective oligonucleotides used for PCR to verify correct integration of the deletion cassette. Sizes of the respective PCR products are mentioned below and numbered on the left. (B) 0.8 % agarose gel with separated PCR products created according to section A.
